# Supplementary material for: The Needs of Family Caregivers of Patients with Chronic Obstructive Pulmonary Disease: A Scoping Review protocol
Source: Research Square preprint supplement (doi:10.21203/rs.3.rs-6737920/v1), 2025-07-30
Supplement: Supplementary file 1 [file 356ffadf7a3218839be6fa28.docx]

**PRISMA-P Checklist (Preferred Reporting Items for Systematic review and Meta-Analysis Protocols)**

This completed checklist outlines the PRISMA-P (2015) reporting guidelines applied to the protocol: 'The Needs of Family Caregivers of Patients with Chronic Obstructive Pulmonary Disease: A Scoping Review Protocol'. Each item includes the corresponding page number and line reference from the manuscript where it is addressed.

| Section/Topic | Checklist Item Description | Page | Location in Text (line or paragraph) |
| --- | --- | --- | --- |
| Title | Identify the report as a protocol of a systematic review | 1 | Title: 'A Scoping Review Protocol' |
| Registration | If registered, provide the name of the registry and registration number | Not registered | Mentioned on page 4, line 5: PROSPERO search conducted but not registered |
| Authors | Provide name, institutional affiliation, and e-mail address of all protocol authors | 1 | Authors and Affiliations section |
| Amendments | State whether the protocol is an amendment of a previously completed or published protocol | Not applicable | No amendments indicated |
| Support | Sources of financial or other support for the review | 11 | Funding section: Iran University of Medical Sciences |
| Introduction - Rationale | Describe the rationale for the review | 2-3 | Introduction paragraphs 1–3 |
| Introduction - Objectives | Provide an explicit statement of the questions the review will address | 4 | Section: 'Review question' |
| Methods - Eligibility criteria | Specify study characteristics and report characteristics to be used as criteria for eligibility | 5 | Section: 'Eligibility criteria' |
| Information sources | Describe all intended information sources (databases, grey literature, etc.) | 6 | Section: 'Search Strategy' |
| Search strategy | Present draft of search strategy to be used for at least one database | 6 | Box 1: PubMed Search Strategy |
| Study records - Data management | Describe the mechanisms to manage records and data | 7 | Section: 'Study/Source of Evidence Selection' |
| Study records - Selection process | Describe the process for selecting studies | 7 | Section: 'Study/Source of Evidence Selection' |
| Study records - Data collection process | Describe planned method of extracting data from reports | 8 | Section: 'Data Extraction' |
| Data items | List and define all variables for which data will be sought | 8-9 | Section: 'Data Extraction' |
| Outcomes and prioritization | List and define all outcomes for which data will be sought | 9-10 | Section: 'Data Analysis and Presentation' |
| Risk of bias in individual studies | Specify method for assessing risk of bias of individual studies | Not applicable | Not performed for scoping review |
| Data synthesis | Describe criteria under which data will be quantitatively synthesized | 9-10 | Section: 'Data Analysis and Presentation' |
| Meta-bias(es) | Specify any planned assessment of meta-bias(es) | Not applicable | Not included due to scoping nature |
| Confidence in cumulative evidence | Describe how strength of the body of evidence will be assessed | Not applicable | Not assessed in scoping reviews |
